# Supplementary material
Source: publisher figshare collection journal article supplement (https://tandf.figshare.com/ndownloader/files/13238393)
Supplement: Supplementary file 1 [file 13238393]

## Sheet: Sheet1
Herbarium	Collection	Taxon	Geography	ATP6	RPB2
NY2072573	ARB1309	G. phaeocyanescens	Crooked River Schoolyard, St. Marys, Camden Co., GA, USA	MF818144	—
CFMR51299	BUF-Both3525	G. umbrinisquamosus	Lake Mize, Alachua Co., FL, USA	MF818145	—
BR	OR482	G. cf. brunneofloccosus	Nangun River National Park, Yunnan, China	MF818146	—
NY2072572	MG639a	G. cyanescens	Along the road between Tornimparte and Borgorose, Lazio, Italy	MF818172	—
NY1292996	ND11	G. cyanescens	Arnolds Point, St. Lawrence Co., NY, USA	MF818173	MF818205
NY1292997	ND12 (B. Overton)	G. cyanescens	Near Curtis Pond, Cranberry Lake, St. Lawrence Co., NY, USA	—	MF818207
NY1393557	ND29 (J. Burghardt)	G. cyanescens	Paul Smith's College, Franklin Co., NY, USA	—	MF818206
NY2072389	REH9970	G. cyanescens	Long Pond, Mount Desert Island, Hancock Co., ME, USA	MF818174	—
NY1782681	OKM22224	G. cyanescens	Odaesan National Park, South Korea	MF818185	—
TNS-F-74913	KH-JPN15-733	G. cyanescens	San-no-sawa, Mt. Daisen, Tottori Prefecture, Japan	MF818191	—
TNS-F-74925	KH-JPN15-745	G. cyanescens	San-no-sawa, Mt. Daisen, Tottori Prefecture, Japan	MF818192	—
NY1194038	REH9479	G. brunnescens	Fraser Island, Great Sandy National Park, Queensland, Australia	—	MF818208
NY1193850	REH9491 [TYPE]	G. brunnescens	Fraser Island, Great Sandy National Park, Queensland, Australia	—	MF818209
NY1491247	REH9673 [TYPE]	G. furvescens	Maiala area walking tracks, vicinity of Mt. Glorious, Queensland, Australia	MF818175	—
NY1491222	REH9700	G. austrocyanescens nom. prov.	Freshwater Road, Cooloola, Great Sandy National Park, Queensland, Australia	MF818176	MF818214
NY1194024	REH8821	G. occidentalis nom. prov.	Ludlow State Forest, Tuart Forest National Park, Western Australia, Australia	MF818177	MF818213
PERTH	E8164	G. occidentalis nom. prov.	Western Australia, Australia	MF818194	—
NY1194030	REH9422	G. neocyanescens nom. prov.	Fraser Island, Great Sandy National Park, Queensland, Australia	—	MF818215
NY1292998	ND13	G. robinsonii nom. prov.	Hamilton Road, between Scotsdale and Denmark, Western Australia, Australia	MF818178	—
NY1491221	REH9700A	G. allocyanescens nom. prov.	Freshwater Road, Cooloola, Great Sandy National Park, Queensland, Australia	MF818179	—
NY1193957	REH9312	G. australiensis	Woralie Road, Fraser Island, Great Sandy National Park, Queensland, Australia	MF818180	—
NY1193849	REH9492	G. australiensis	Fraser Island, Great Sandy National Park, Queensland, Australia	MF818181	MF818210
NY1194037	REH9482	G. australiensis	Fraser Island, Great Sandy National Park, Queensland, Australia	—	MF818212
NY1193847	REH9559	G. australiensis	Freshwater Road, Cooloola, Great Sandy National Park, Queensland, Australia	MF818182	MF818211
NY1193824	REH9501 [TYPE]	G. australiensis	Northern Road, Fraser Island, Great Sandy National Park, Queensland, Australia	MF818183	—
NY1194046	REH8799	G. longicystidiatus	Pathummikaram Temple, Chiang Mai Province, Thailand	MF818147	FJ536642
BR	OR235	G. longicystidiatus	Xiaofakuai, Yunnan, China	MF818154	MF818202
BR	OR238	G. longicystidiatus	Xiaofakuai, Yunnan, China	MF818155	—
TMI26055	EN99-67 [PARATYPE]	G. longicystidiatus	Nakatado, Kagawa Prefecture, Japan	MF818151	—
BR	OR84	G. longicystidiatus	Near temple opposite Mushroom Research Centre, Chiang Mai Province, Thailand	—	MF818201
BR	OR74	G. longicystidiatus	Mae Sae, Mae Taeng District, Chiang Mai Province, Thailand	MF818152	—
BR	OR659	G. longicystidiatus	Behind Mushroom Research Centre, across stream, Chiang Mai Province, Thailand	—	MF818203
BR	OR394	G. longicystidiatus	Mae Pong, Chiang Mai Province, Thailand	MF818153	—
NY48429	AEFM498	G. paralongicystidiatus	Natural Reserve El Guayabo, Tunia, Cauca, Colombia	MF818148	—
NY181466	REH7725	G. paralongicystidiatus	Savegre, ±5 km SW of Cerro de la Muerte, Dota, San José, Costa Rica	MF818149	—
NY575827	REH8274 [TYPE]	G. paralongicystidiatus	Savegre, ±5 km SW of Cerro de la Muerte, Dota, San José, Costa Rica	MF818150	MF818204
BR	OR182	G. sp.	Mae Sae, Mae Taeng District, Chiang Mai Province, Thailand	MF818156	MF818199
NY1194020	REH8805	G. sp.	Mae Sae, Mae Taeng District, Chiang Mai Province, Thailand	—	MF818200
CFMR	BOS472	G. sp.	Five Sisters Lodge, Mountain Pine Ridge, Cayo, Belize	MF818196	—
NY1194004	REH9411	G. naranjus nom. prov.	Fraser Island, Great Sandy National Park, Queensland, Australia	MF818157	MF818233
NY1194040	REH9020	G. naranjus nom. prov.	Fraser Island, Great Sandy National Park, Queensland, Australia	MF818158	MF818234
NY	TH9913	G. sp.	Dja Biosphere Reserve (northwest sector near Somalomo), East Province, Cameroon	MF818170	MF818235
BR5020022102839	Thoen7634	G. sp.	Casamance, Senegal	MF818171	MF818236
NY48431	REH4511	G. castaneus	Juniper Springs, Ocala National Forest, Marion Co., FL, USA	MF818159	MF818220
NY2072725	ND57	G. castaneus	Gainesville, Alachua Co., FL, USA	MF818165	—
MICH232867	R.A.Powers2014070101	G. castaneus	Bird Hills Nature Area, Ann Arbor, Washtenaw Co., MI, USA	MF818166	—
NY181465	REH7761	G. castaneus	15 km S of Liberia, 17 km E of Inter-American Highway, Guanacaste, Costa Rica	MF818162	—
NY1393584	ND31	G. castaneus	New York Botanical Garden grounds, Bronx Co., NY, USA	MF818163	MF818216
NY2072568	CS1	G. castaneus	Santa Cruz Co., CA, USA	MF818169	—
NY2072567	MG531	G. castaneus	Manziana, Lazio, Italy	MF818167	—
BR5020162974143	VDKO979	G. castaneus	Vicinity of Sint-Pieters-Rode, Vlaams-Brabant, Belgium	MF818168	MF818222
NY2072571	MG591	G. castaneus	Sabaudia, Latina, Lazio, Italy	MF818189	—
NY2072569	SW73 (A. Naseer)	G. castaneus	Swat, Khyber Pakhtunkhwa, Pakistan	MF818184	—
NY2072724	ND58 (W. Sturgeon)	G. castaneus	East Liverpool, Columbiana Co., OH, USA	MF818160	—
NY2072723	ND59 (W. Sturgeon)	G. castaneus	East Liverpool, Columbiana Co., OH, USA	MF818161	—
NY1393558	ND30 (T. Delaney)	G. castaneus	East Woods, South Burlington, Chittenden Co., VT, USA	MF818187	MF818217
WTU-F-48413	JFA13725	G. castaneus	University of Washington campus, King Co., WA, USA	MF818193	—
NY1782655	OKM22312	G. castaneus	Kapsa Temple, Gyeryongsan National Park, South Korea	MF818186	—
TNS-F-47417	KH-TBG12-712	G. castaneus	Tsukuba Botanical Garden, Ibaraki Prefecture, Japan	MF818188	MF818219
TNS-F-49909	KH-JPN12-770	G. castaneus	Near Fugaku Cave, Fujikawaguchiko, Yamanashi Prefecture, Japan	MF818190	MF818218
NY2072570	SW33 (A. Naseer)	G. castaneus	Swat, Khyber Pakhtunkhwa, Pakistan	MF818164	—
PERTH	E8155	G. mcnabbii	Parkerville, Perth, Western Australia, Australia	MF818195	—
NY1393503	REH9808 [TYPE]	G. mcnabbii	Vicinity of Mt. Glorious, D'Aguilar National Park, Queensland, Australia	MF818197	MF818231
NY1194001	REH8979	G. mcnabbii	Route 97, Queensland/New South Wales border, Queensland, Australia	—	MF818232
NY1491246	REH9677	G. mcnabbii	Freshwater Road, Cooloola, Great Sandy National Park, Queensland, Australia	—	MF818230
NY1194045	REH8955	G. mcnabbii	Davies Creek National Park, Mareeba, Queensland, Australia	MF818198	MF818229
NY1393663	MES665	G. subalbellus	Sugarfoot, Gainesville, Alachua Co., FL, USA	—	MF818223
NY1393576	ND15 (I. Safonov)	G. subalbellus	Franklin Parker Preserve, Chatsworth, Burlington Co., NJ, USA	—	MF818224
NY1393582	ND26 (A. R. Franck)	G. subalbellus	Sweetgum Lane, University of South FL campus, Hillsborough Co., FL, USA	—	MF818225
NY2072575	ND61 (A. R. Bessette)	G. subalbellus	Semper Virens Trail, Crooked River State Park, St. Marys, Camden Co., GA, USA	—	MF818226
BR	OR801	G. sp.	Kew Fin, Chiang Mai/Lampang border, Chiang Mai Province, Thailand	—	MF818227
BR	OR870	G. sp.	Ban Mae Sae, Chiang Mai Province, Thailand	—	MF818228
NY48356	REH6907	G. purpurinus	Indian Creek, Great Smoky Mountains National Park, Swain Co., NC, USA	—	MF818221
